# Supplementary material for: Development and Characterization of a Novel Peptide—Drug Conjugate with DM1 for Treatment of FGFR2-Positive Tumors
Source: MDPI journal article supplement (doi:10.3390/biomedicines9080849), 2021-07-21
Supplement: s1 [file s1]

## Supplementary data

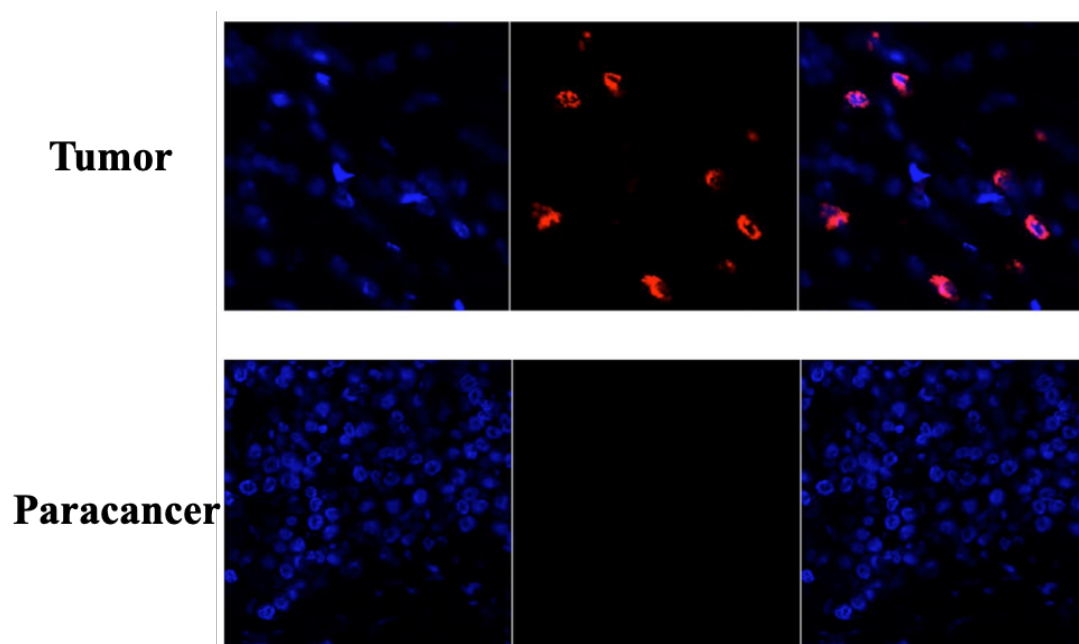

**Figure S1.** The observation of fluorescence signal of LLC2B-L-Cy5.5 from human esophagus cancer and paracancer of esophagus cancer by confocal microscope.

## List of amino acids of 5'-XXXQ'A'E'XX-3' OBOC library:

X: 42 natural/non-natural amino acids

Amino acids at position Q': [Q/Hocit/n/Cit](#)

Amino acids at position A': [A/G/Aib/V/Acpc](#)

Amino acids at position E': [E/d/Aad](#)

**Table S1 42 Fmoc-amino Acids**

|                                                                                                                                                       |                                                                                                                                                  |                                                                                                                                              |                                                                                                                                                     |
|-------------------------------------------------------------------------------------------------------------------------------------------------------|--------------------------------------------------------------------------------------------------------------------------------------------------|----------------------------------------------------------------------------------------------------------------------------------------------|-----------------------------------------------------------------------------------------------------------------------------------------------------|
| <p><b>#1</b></p> <p>Fmoc- Orn(Boc)-OH</p> <p>MW: 454.5 (132.12)</p> 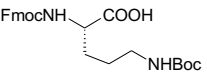 | <p><b>#2</b></p> <p>Fmoc-Acpc-OH</p> <p>MW: 323.35 (101.1)</p>  | <p><b>#3</b></p> <p>Fmoc-L-HoCit</p> <p>MW: 411.4</p>      | <p><b>#4</b></p> <p>Fmoc-Hyp(tBu)-OH</p> <p>MW: 409.0</p>        |
| <p><b>#5</b></p> <p>Fmoc-Aad(OtBu)-OH</p> <p>MW: 439.6</p>         | <p><b>#6</b></p> <p>Fmoc-D-3-Pal-OH</p> <p>MW: 388.4</p>      | <p><b>#7</b></p> <p>Fmoc- Aib-OH</p> <p>MW: 325.5</p>    | <p><b>#8</b></p> <p>Fmoc- Nva-OH</p> <p>MW: 339.4</p>          |
| <p><b>#9</b></p> <p>Fmoc-Dpr(Boc)-OH</p> <p>MW: 426.4</p>          | <p><b>#10</b></p> <p>Fmoc-D-Tyr(Me)-OH</p> <p>MW: 417.47</p>  | <p><b>#11</b></p> <p>Fmoc-L-Phg-OH</p> <p>MW: 373.4</p>  | <p><b>#12</b></p> <p>Fmoc-Nle-OH</p> <p>MW: 353.4</p>          |
| <p><b>#13</b></p> <p>N-Fmoc-amino-(4-N-Boc-piperidiny) carboxylic acid</p> <p>MW:466.53 (4-Apc)</p>                                                   | <p><b>#14</b></p> <p>Fmoc-Phe(4-Me)-OH</p> <p>MW: 401.46</p>  | <p><b>#15</b></p> <p>Fmoc-Aic-OH</p> <p>MW: 399.45</p>   | <p><b>#16</b></p> <p>Fmoc-D-Phe(3-Cl)-OH</p> <p>MW: 421.9</p>  |

|                                                                                                                                                      |                                                                                                                                                            |                                                                                                                                                            |                                                                                                                                                         |
|------------------------------------------------------------------------------------------------------------------------------------------------------|------------------------------------------------------------------------------------------------------------------------------------------------------------|------------------------------------------------------------------------------------------------------------------------------------------------------------|---------------------------------------------------------------------------------------------------------------------------------------------------------|
| 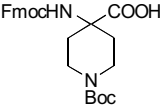                                                                    |                                                                                                                                                            |                                                                                                                                                            |                                                                                                                                                         |
| <p><b>#17</b></p> <p>Fmoc-D-HoPhe-OH</p> <p>MW: 401.5</p>           | <p><b>#18</b></p> <p>Fmoc-D-Chg-OH</p> <p>MW: 379.4</p>                   | <p><b>#19</b></p> <p>Fmoc-Bpa-OH</p> <p>MW: 491.5</p>                    | <p><b>#20</b></p> <p>Fmoc-Arg(Pbf)-OH</p> <p>MW: 648.8</p> <p>R</p>  |
| <p><b>#21</b></p> <p>Fmoc-D-2-Nal-OH</p> <p>MW: 437.47</p>          | <p><b>#22</b></p> <p>Fmoc-L-1-Nal-OH</p>                                  | <p><b>#23</b></p> <p>Fmoc-Phe(3,4-diCl)-OH</p> <p>MW: 456.4</p>          | <p><b>#24</b></p> <p>Fmpc-Cha-OH</p> <p>MW: 393.48</p>               |
| <p><b>#25</b></p> <p>Fmoc-D-Ala-OH</p> <p>MW: 311.3</p> <p>a</p>  | <p><b>#26</b></p> <p>Fmoc-D-Glu(OtBu)-OH</p> <p>MW: 425.5</p> <p>e</p>  | <p><b>#27</b></p> <p>Fmoc-D-Asn(Trt)-OH</p> <p>MW: 596.7</p> <p>n</p>  | <p><b>#28</b></p> <p>Fmoc-Ile-OH</p> <p>MW:353.4</p> <p>l</p>      |
| <p><b>#29</b></p> <p>Fmoc-D-Leu-OH</p> <p>MW: 353.4</p> <p>l</p>  | <p><b>#30</b></p> <p>Fmoc-D-Lys(Boc)-OH</p> <p>MW:468.6</p> <p>k</p>    | <p><b>#31</b></p> <p>Fmoc-D-Ser(tBu)-OH</p> <p>MW: 383.4</p> <p>s</p>  | <p><b>#32</b></p> <p>Fmoc-D-Met-OH</p> <p>MW: 371.5</p> <p>m</p>   |
| <p><b>#33</b></p> <p>Fmoc-D-Phe-OH</p> <p>MW: 387.4</p> <p>f</p>  | <p><b>#34</b></p> <p>Fmoc-D-Pro-OH</p> <p>MW: 337.4</p> <p>p</p>        | <p><b>#35</b></p> <p>Fmoc-L-Thr(tBu)-OH</p> <p>MW: 397.5</p> <p>T</p>  | <p><b>#36</b></p> <p>Fmoc-L-Val-OH</p> <p>MW: 339.4</p> <p>V</p>   |

|                                                                                                                                                           |                                                                                                                                                           |                                                                                                                                                           |                                                                                                                                                              |
|-----------------------------------------------------------------------------------------------------------------------------------------------------------|-----------------------------------------------------------------------------------------------------------------------------------------------------------|-----------------------------------------------------------------------------------------------------------------------------------------------------------|--------------------------------------------------------------------------------------------------------------------------------------------------------------|
| <b>#37</b><br><b>Fmoc-D-Trp(Boc)-OH</b><br><b>MW: 526.6</b> <b>w</b><br>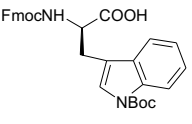 | <b>#38</b><br><b>Fmoc-D-His(Trt)-OH</b><br><b>MW: 619.7</b> <b>h</b><br> | <b>#39</b><br><b>Fmoc-Asp(OtBu)-OH</b><br><b>MW: 411.5</b> <b>D</b><br> | <b>#40</b><br><b>Fmoc-Gln(Trt)-OH</b><br><b>MW: 610.7</b><br><b>Q</b><br> |
| <b>#41</b><br><b>Fmoc-Tyr(tBu)-OH</b><br><b>MW: 459.6</b> <b>Y</b><br>   | <b>#42</b><br><b>Fmoc-Gly-OH</b><br><b>MW: 297.3</b> <b>G</b>                                                                                             |                                                                                                                                                           |                                                                                                                                                              |

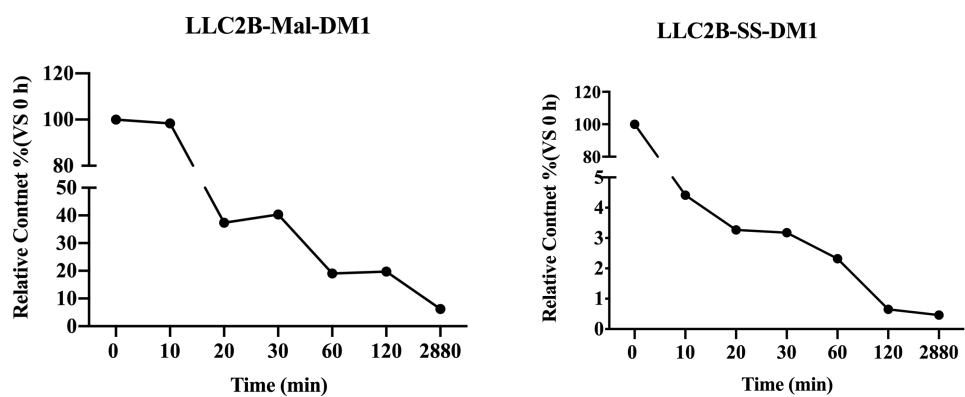

**Figure S2.** The remaining percentage of LLC2B-Mal-DM1, LLC2B-SS-DM1 that's being mixed with murine plasma at different time points

**Table S2** Tumor volume (mm<sup>3</sup>) in the PBS, free DM1, LLC2B-SS-DM1group

|             | <b>PBS</b>     | <b>0.5 mg Free DM1/kg</b> | <b>0.5 mg DM1 equiv./kg</b> | <b>1.0 mg DM1 equiv./kg</b> | <b>2.0 mg DM1 equiv./kg</b> |
|-------------|----------------|---------------------------|-----------------------------|-----------------------------|-----------------------------|
| <b>0 d</b>  | 156.87±67.61   | 175.68±59.92              | 101.07±81.57                | 118.88±32.94                | 126.80±38.96                |
| <b>2 d</b>  | 679.76±202.24  | 314.80±122.30             | 226.16±129.38               | 184.22±33.22                | 223.67±53.70                |
| <b>4 d</b>  | 876.51±185.09  | 551.00±238.38             | 304.04±157.48               | 283.28±88.46                | 321.17±107.85               |
| <b>6 d</b>  | 944.05±289.43  | 557.43±209.97             | 389.20±198.90               | 272.22±113.49               | 280.78±95.68                |
| <b>8 d</b>  | 1203.71±398.07 | 654.39±219.50             | 426.44±198.04               | 334.59±117.92               | 360.58±82.08                |
| <b>10 d</b> | 1290.61±441.17 | 650.06±336.33             | 499.04±194.24               | 395.08±132.16               | 273.01±107.62               |
| <b>12 d</b> | 1529.18±536.95 | 772.79±324.13             | 541.61±312.25               | 388.28±121.27               | 355.51±151.42               |
| <b>14 d</b> | 1707.01±431.41 | 788.24±379.02             | 593.61±364.12               | 393.89±187.58               | 461.17±136.73               |
| <b>16 d</b> | 1895.95±561.93 | 873.66±422.26             | 781.68±522.51               | 466.38±156.74               | 411.41±168.66               |
| <b>18 d</b> | 1977.21±609.36 | 893.32±477.86             | 790.28±366.88               | 564.61±188.93               | 540.99±193.86               |
| <b>20 d</b> | 2315.02±430.85 | 1110.11±531.65            | 713.09±359.65               | 567.38±204.08               | 604.21±201.81               |

**Table S3** Tumor volume (mm<sup>3</sup>) in the PBS, free DM1, LLC2B-Mal-DM1group

|             | <b>PBS</b>     | <b>1.0 mg Free DM1/kg</b> | <b>1.0 mg DM1 equiv./kg</b> | <b>2.0 mg DM1 equiv./kg</b> | <b>4.0 mg DM1 equiv./kg</b> |
|-------------|----------------|---------------------------|-----------------------------|-----------------------------|-----------------------------|
| <b>0 d</b>  | 212.98±113.45  | 167.91±51.37              | 123.92±35.19                | 204.16±84.38                | 187.26±94.71                |
| <b>2 d</b>  | 651.09±182.05  | 333.54±106.62             | 184.85±129.03               | 329.89±146.35               | 408.83±131.11               |
| <b>4 d</b>  | 880.35±160.43  | 499.47±119.89             | 301.27±140.11               | 461.08±181.64               | 535.64±174.77               |
| <b>6 d</b>  | 989.95±262.97  | 653.81±266.46             | 357.78±258.20               | 651.88±257.36               | 706.23±296.92               |
| <b>8 d</b>  | 1223.14±346.38 | 985.99±232.74             | 488.31±344.39               | 678.53±157.79               | 754.99±348.08               |
| <b>10 d</b> | 1312.66±383.96 | 838.17±157.44             | 562.06±270.65               | 552.08±177.84               | 858.62±298.09               |
| <b>12 d</b> | 1539.65±465.37 | 1176.08±97.85             | 705.13±200.23               | 787.04±251.09               | 806.65±165.51               |
| <b>14 d</b> | 1662.22±381.58 | 1287.25±178.41            | 752.16±212.63               | 817.69±244.31               | 1050.39±437.35              |
| <b>16 d</b> | 1898.21±486.66 | 1286.39±189.90            | 773.25±228.24               | 890.28±412.67               | 965.55±308.55               |
| <b>18 d</b> | 1992.15±528.35 | 1395.67±243.57            | 904.65±254.13               | 1025.35±439.18              | 1047.92±374.01              |
| <b>20 d</b> | 2349.32±377.83 | 1727.06±280.01            | 1250.63±342.99              | 1130.29±354.15              | 1166.16±373.54              |
